# Supplementary material for: Recommendations for the clinical interpretation and reporting of copy number gains using gene panel NGS analysis in routine diagnostics
Source: Virchows Arch. 2019 Mar 19;474(6):673–80. doi: 10.1007/s00428-019-02555-3 (PMC6581937; doi:10.1007/s00428-019-02555-3)
Supplement: Supplementary file 1 — An overview of the approaches for copy number analyses in routine gene panel NGS using for predictive testing of FFPE specimen work-up of nine hospital-based molecular pathology laboratories in the Netherlands (April 2018). (XLSX 12 kb) [file 428_2019_2555_MOESM1_ESM.xlsx]

## Sheet: Supplementary Table 1
	LAB 1 & 2	LAB 3	LAB 4	LAB 5	LAB 6	LAB 7	LAB 8 (validation fase)	LAB 9
NGS Platform	Illumina	ThermoFisher (Life Technologies)	ThermoFisher (Life Technologies)	Thermo Fisher (Life Technologies)	ThermoFisher (Life Technologies)	Illumina	Illumina	Illumina
CNV detection software	CoDeCZ	JSI SeqNext, ONCOCNV, in-house developed script (SNPitty) and spreadsheats	Laboratory developed script	Laboratory developed script, SNPitty	Laboratory developed script	JSI SeqNext and laboratory developed spreadsheets.	Quantidex Reporter (Asuragen) and laboratory developed spreadsheets	JSI SeqNext and laboratory developed spreadsheets.
Panel size (number of genes for which hotspots or relevant coding/splice sequences are analyzed)	48 genes (~35kb)	44 genes (~38kb); 34 genes (~155kb); 6 genes (~44kb); 7 genes (~35kb)	80 genes (~40kb)	55 genes (~35kb)	22 genes (~15 kb) and 34 genes (~54 kb)	33 genes (~13 kb)	33 genes (~13 kb)	21 genes (~14kb)
Reference pool	External reference: 20 normal FFPE samples, pre-run separately.	External reference: 13 (spreadsheats) or 4-7 (ONCOCNV) normal FFPE samples, pre-run in multiple separate runs	Internal reference: all samples in same batch, including controls / normal FFPE samples	External reference: 10-15 normal FFPE samples	External reference: 10 normal FFPE samples	External reference: 16 normal FFPE samples pre-run in multiple separate runs.	Internal reference (including control/normal FFPE samples in each batch)	External reference: 16 normal FFPE samples pre-run in multiple separate runs.
	Control samples included in each run.	BAF based analyses: no references needed.	Low quality samples are not taking along in the normalisation			Monthly positive control to check stability.		Monthly positive control to check stability.
Brief description method	Normalized coverage, compared with reference pool, correction factor	Visual inspection of BAF and raw coverage plot.	Normalized coverage, compared with reference pool, identify CN gains and losses using 99% confidence intervals calculated per gene and using all high quality samples. Quantile smoothing of amplicon values per gene or exon.	Normalized coverage, compared with reference pool, correction factor	Normalized coverage, compared with reference pool.	Normalized unique coverage, compared with reference pool.	Normalized coverage, compared within batch (also including control/normal samples).	Normalized unique coverage, compared with reference pool.
	Neighboring regions with sifnificant z-scores are aggegated, total z-score of the region /gene calculated	Visual inspection of amplicon ranking	Samples with a low coverage are removed. Samples with a low variable coverage are selected and the normalization is repeated for systematic differences between amplicons.	Visual inspection of BAFs	Visual inspection of BAFs	A minimal median coverage per amplicon of >70 gDNA molecules is required to exclude poor quality (more noisy) analyses.		A minimal median coverage per amplicon of >70 gDNA molecules is required to exclude poor quality (more noisy) analyses.
		Normalized coverage, compared with reference pool, log2 plot for visual inspection.				Visual inspection of BAFs for 1p/19q co-deletion		Summed coverage and relative scores per gene.
Visualisation	Coverage	Coverage and BAF-plot	Coverage and BAF-plot	Z-scores	Coverage and BAF-plot	Coverage and Z-scores	Copy number variant score (CNV-score) ≈ relative coverage	Coverage and Z-scores
Quality score/ Method to discriminate CNV from noise	>3 connected amplicons	only amplicons with a coverage >100 are used.	CNV identification within 99% confidence interval	>5 consecutive amplicons	z-score (>7)	Relative coverage >3 (this represents a z-score>6 for all relevant genes for copy number gains).	CNV-score >2.5	Relative coverage >3 (this represents a z-score>6 for all relevant genes for copy number gains).
	z-score (> 1.5)	>1 consecutive amplicons needed for calling an aberration.		z-score >10.		A minimal unique coverage per amplicon of >70 gDNA molecules to exclude poor quality analyses.		A minimal unique coverage per amplicon of >70 gDNA molecules to exclude poor quality analyses.
		For amplificion calling (all methods) at least 3 amplicons per gene are used, they all need to show a copy number gain				Visual inspection of all individual amplicons		Visual inspection of individual amplicons
CNV confirmation in routine diagnostics?	ISH (at least in case of borderline results)	When required for clinical purposes: FISH (MET/ERBB2/EGFR amplifications, CDKN2A deletions) or MLPA (BRCA/MMR deletions)	FISH in case of unclear results; MLPA (BRCA1)	For targetable genes always confirmed with FISH or MLPA for genes other than EGFR (also with high confident scores)	FISH (MET/ FGFR1/ ERBB2), MLPA (BRCA1/2, MMR, RB1, P16) or IHC	For targetable genes: relative coverage >3, no confirmation required	For targetable genes: CNV score >2.5, confirm by FISH	For targetable genes: relative coverage >3, confirm by FISH
						For targetable genes: relative coverage 2-3, report 'potential amplification', confirm in case clinically relevant (IHC, FISH)
Report	Amplifications	Amplifications, gains, (partial) chromosomal loss and homozygous deletions, imbalance (unclear if gain of loss, based on BAF)	Amplifications, deletions, LOH, imbalance, partial chromosomal loss	Amplifications, deletions, imbalances (unclear if gain of loss, based on BAF)	Amplifications, deletions, LOH	Amplifications; 1p/19q co-deletion		Amplifications
				z-score and number of amplicons	z-score	relative coverage, z-score, estimated number of copies deduced from relative coverage and estimated tumorcell %		relative coverage, z-score, estimated number of copies deduced from relative coverage and estimated tumorcell %
						detection limit (based on estimated tumorcell %)		detection limit (based on estimated tumorcell %)
